# Supplementary material for: Removal of CO2from high-temperature flue gas using PDMS/IL composite membranes
Source: Royal Society of Chemistry journal article supplement (doi:10.1039/d1nj04493a), 2021-12-15
Supplement: d1nj04493a1.pdf [file d1nj04493a1.pdf]

Electronic Supplementary Material (ESI) for New Journal of  
Chemistry

*Electronic Supplementary Information*

**Removal of CO<sub>2</sub> from High-Temperature Flue Gas by PDMS/IL  
composite membranes**

Mian Wu<sup>a</sup>, Xuehua Li<sup>a</sup>, Xiaobing Li<sup>b\*</sup>

<sup>a</sup>School of Chemical Engineering and Technology, China University of Mining and Technology,

Xuzhou, Jiangsu 221116, PR China

<sup>b</sup>National Center for Coal Preparation and Purification Engineering Research, China University of

Mining and Technology, Xuzhou, Jiangsu 221116, PR China

---

Corresponding author at: National Center for Coal Preparation and Purification Engineering Research, China University of Mining and Technology, No.1 Daxue Road, South, Xuzhou, Jiangsu 221116, China. Tel.: +86-516-83591117. Fax: +86-516-83885878.

*E-mail address:* Xiaobing.li@cumt.edu.cn (Xiaobing Li)

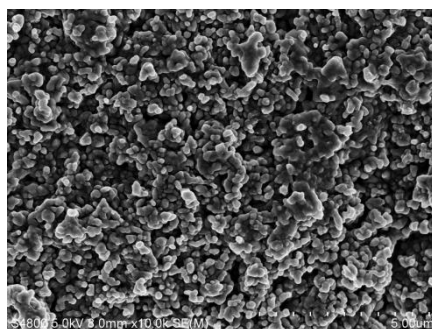

**Fig. S1** SEM image of PDMS/IL composite membrane on a bare  $\alpha$ -alumina substrate.

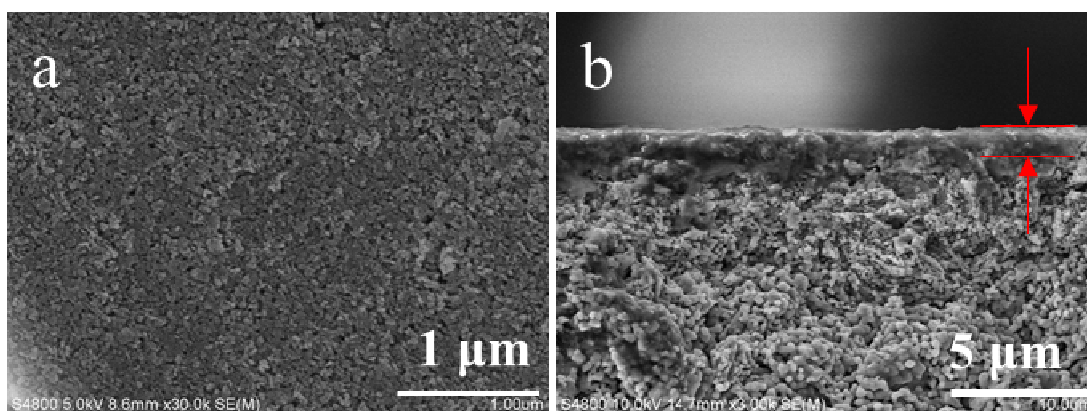

**Fig. S2** SEM images of  $\gamma$ -alumina buffer layer on  $\alpha$ -alumina substrate: top-view (a) and cross-section (b).

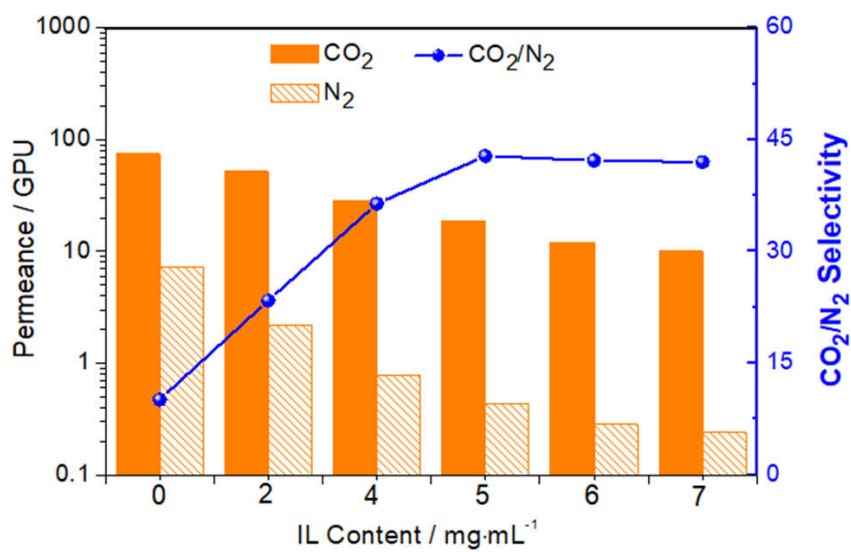

**Fig. S3** The influence of IL contents on the separation performance of the composite membranes.

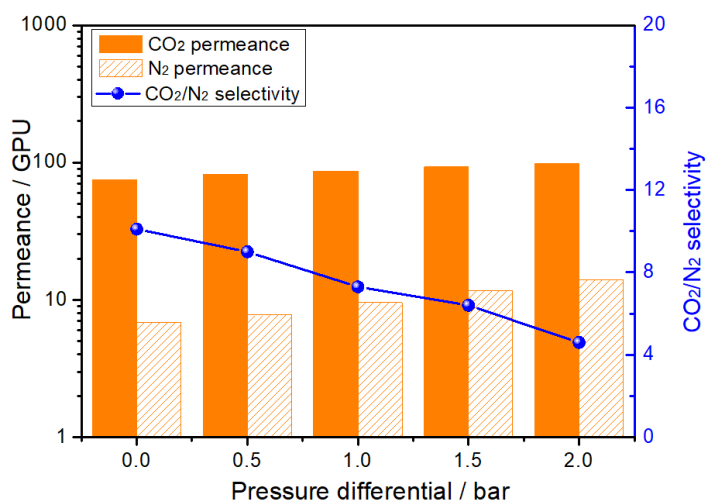

**Fig. S4** The CO<sub>2</sub>/N<sub>2</sub> separation performance of the PDMS membrane as a function of the trans-membrane pressure.

**Table S1** Ionic liquids tested in the present study and their most relevant properties at °C.

| Ionic liquid              | T <sub>g</sub> <sup>a</sup> | T <sub>d</sub> <sup>b</sup> | Density <sup>c</sup> | Viscosity <sup>d</sup> |
|---------------------------|-----------------------------|-----------------------------|----------------------|------------------------|
| [Bmim][Tf <sub>2</sub> N] | 187.15                      | 675.15                      | 1.437                | 0.069                  |

<sup>a</sup>T<sub>g</sub> = glass transition temperature (°C). <sup>b</sup>T<sub>d</sub> = decomposition temperature (°C). <sup>c</sup>Density at 30 °C (g/cm<sup>3</sup>). <sup>d</sup>Measured viscosity at 30 °C (η, Pa·s).

**Table S2** The permeability coefficients, diffusion coefficients and solubility coefficients of CO<sub>2</sub> and N<sub>2</sub> of PDMS membrane by time-lag system under different temperatures.

| Temperature | Gas             | P (barrer) | D (10 <sup>-6</sup> cm <sup>2</sup> /s) | S (10 <sup>-4</sup> cm <sup>3</sup> (STP)/cm <sup>3</sup> cmHg) | P <sub>CO2</sub> /P <sub>N2</sub> |
|-------------|-----------------|------------|-----------------------------------------|-----------------------------------------------------------------|-----------------------------------|
| 25°C        | CO <sub>2</sub> | 74.6       | 0.43                                    | 173.5                                                           | 10.1                              |
|             | N <sub>2</sub>  | 7.38       | 0.48                                    | 15.4                                                            |                                   |
| 60°C        | CO <sub>2</sub> | 77.6       | 0.62                                    | 125.2                                                           | 8.6                               |
|             | N <sub>2</sub>  | 9          | 0.68                                    | 13.2                                                            |                                   |
| 90°C        | CO <sub>2</sub> | 84.7       | 1.05                                    | 80.7                                                            | 7.8                               |
|             | N <sub>2</sub>  | 11.3       | 1.10                                    | 10.3                                                            |                                   |
| 120°C       | CO <sub>2</sub> | 88.1       | 1.51                                    | 58.3                                                            | 6.7                               |
|             | N <sub>2</sub>  | 13.1       | 1.55                                    | 8.45                                                            |                                   |
| 150°C       | CO <sub>2</sub> | 86.8       | 2.25                                    | 38.6                                                            | 4.9                               |
|             | N <sub>2</sub>  | 17.7       | 2.41                                    | 7.35                                                            |                                   |

**Table S3** The permeability coefficients, diffusion coefficients and solubility coefficients of CO<sub>2</sub> and N<sub>2</sub> of PDMS/IL composite membrane by time-lag system under different temperatures.

| Temperature | Gas             | P (barrer) | D (10 <sup>-6</sup> cm <sup>2</sup> /s) | S (10 <sup>-4</sup> cm <sup>3</sup> (STP)/cm <sup>3</sup> cmHg) | P <sub>CO2</sub> /P <sub>N2</sub> |
|-------------|-----------------|------------|-----------------------------------------|-----------------------------------------------------------------|-----------------------------------|
| 25°C        | CO <sub>2</sub> | 18.9       | 0.22                                    | 85.9                                                            | 42.8                              |
|             | N <sub>2</sub>  | 0.43       | 0.27                                    | 1.59                                                            |                                   |
| 60°C        | CO <sub>2</sub> | 20.1       | 0.42                                    | 47.9                                                            | 35.6                              |
|             | N <sub>2</sub>  | 0.55       | 0.49                                    | 1.12                                                            |                                   |
| 90°C        | CO <sub>2</sub> | 20.9       | 0.85                                    | 24.6                                                            | 31.5                              |
|             | N <sub>2</sub>  | 0.65       | 0.89                                    | 0.73                                                            |                                   |
| 120°C       | CO <sub>2</sub> | 21.3       | 1.20                                    | 17.8                                                            | 22.5                              |
|             |                 | 0.93       | 1.32                                    | 0.70                                                            |                                   |
| 150°C       | CO <sub>2</sub> | 22.6       | 1.95                                    | 11.6                                                            | 21.4                              |
|             | N <sub>2</sub>  | 1.06       | 2.19                                    | 0.48                                                            |                                   |

**Table S4** The separation performance of five PDMS/IL composite membranes prepared in the same batch at 150 °C

| Membrane | CO <sub>2</sub> permeance<br>(GPU) | N <sub>2</sub> permeance<br>(GPU) | CO <sub>2</sub> /N <sub>2</sub><br>selectivity | Average<br>selectivity | Standard<br>deviation | RSD  |
|----------|------------------------------------|-----------------------------------|------------------------------------------------|------------------------|-----------------------|------|
| M1       | 20.9                               | 0.93                              | 22.6                                           | 21.9                   | 1.54                  | 7.0% |
| M2       | 21.9                               | 1.08                              | 20.2                                           |                        |                       |      |
| M3       | 21.3                               | 0.89                              | 23.9                                           |                        |                       |      |
| M4       | 23.0                               | 1.03                              | 22.3                                           |                        |                       |      |
| M5       | 23.5                               | 1.46                              | 20.5                                           |                        |                       |      |
